# Supplementary material for: Early Perturbations in Glucose Utilization in Malaria-Infected Murine Erythrocytes, Liver and Brain Observed by Metabolomics
Source: MDPI journal article supplement (doi:10.3390/metabo10070277), 2020-07-07
Supplement: s1 [file s1]

Supplementary table 1:  $^{13}\text{C}$  chemical shifts of significant loadings from liver OPLS-DA analysis. The chemical shifts were putatively identified using hmdb.

| Sample type               | $^{13}\text{C}$ ppm | Assignment                 |
|---------------------------|---------------------|----------------------------|
| Liver hydrophilic extract | 73.58               | glycerol C2                |
|                           | 70.47               | cysteine C2                |
|                           | 27.21               | glutamine C3               |
|                           | 69.31               | lactate C2                 |
|                           | 54.9                | alanine C2                 |
| Liver hydrophobic extract | 128                 | polyunsaturated fatty acid |
